# Supplementary material for: Social dominance orientation as an obstacle to intergroup apology
Source: PLoS One. 2019 Jan 25;14(1):e0211379. doi: 10.1371/journal.pone.0211379 (PMC6347393; doi:10.1371/journal.pone.0211379)
Supplement: S6 Table — (XLSX) [file pone.0211379.s009.xlsx]

## Sheet: Descriptive Stats
	General Apology				War Apology				Fukushima Apology
	Estimate	β		SE	Estimate	β		SE	Estimate	β		SE
SDO	-0.18	-0.24	**	0.02493	-0.19	-0.23	**	0.02702	-0.18	-0.21802	**	0.02838
Conservatism	-0.06	-0.16	**	0.01205	-0.07	-0.16	**	0.01306	-0.06	-0.13191	**	0.01372
militarism	-0.26	-0.3	**	0.02834	-0.29	-0.31	**	0.03072	-0.19	-0.20749	**	0.03227
*p < .05, **p < .01
